# Supplementary material for: Transcriptomics of the Rooibos (Aspalathus linearis) Species Complex
Source: PubMed Central journal article supplement (PMC9258316; doi:10.3390/biotech9040019), 2020-09-23
Supplement: biotech-09-00019-s001.pdf [file biotech-09-00019-s001.pdf]

# Supplementary Materials: Transcriptomics of the Rooibos (*Aspalathus linearis*) Species Complex

Emily A Stander <sup>1</sup>, Wesley Williams <sup>1,2</sup>, Yamkela Mgwatyu <sup>1</sup>, Peter van Heusden <sup>1</sup>, Fanie Rautenbach <sup>3</sup>, Jeanine Marnewick <sup>3</sup>, Marilize le Roes-Hill <sup>3</sup>, Uljana Hesse <sup>1,2,4,\*</sup>

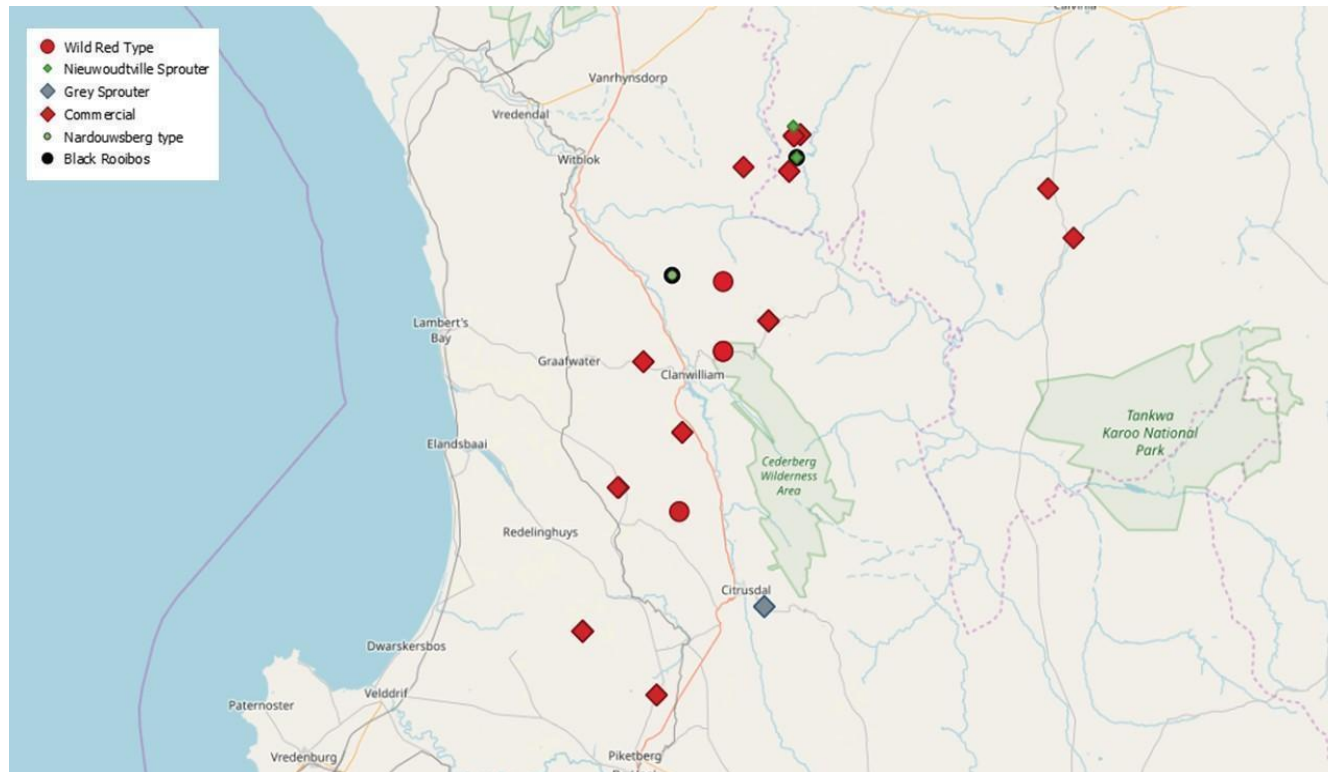

Supplementary Figure S1: Distribution of the collected rooibos ecotypes sampled for this study.

**Supplementary Table S1:** Number of overlapping orthogroups predicted by OrthoFinder.

|                         | number of sequences | A            | B            | C            | D            | <i>L. angustifolius</i> | <i>L. japonicus</i> | <i>M. truncatula</i> | <i>A. thaliana</i> | <i>O. sativa</i> |
|-------------------------|---------------------|--------------|--------------|--------------|--------------|-------------------------|---------------------|----------------------|--------------------|------------------|
| <b>A</b>                | 85234               | <b>29535</b> | 20486        | 19144        | 19629        | 12744                   | 13471               | 13333                | 11429              | 10943            |
| <b>B</b>                | 91301               | 20486        | <b>28650</b> | 19545        | 19755        | 12819                   | 13546               | 13439                | 11485              | 10992            |
| <b>C</b>                | 74767               | 19144        | 19545        | <b>26334</b> | 18968        | 12823                   | 13434               | 13360                | 11489              | 10937            |
| <b>D</b>                | 79234               | 19629        | 19755        | 18968        | <b>26912</b> | 12604                   | 13296               | 13187                | 11357              | 10873            |
| <i>L. angustifolius</i> | 33076               | 12744        | 12819        | 12823        | 12604        | <b>14308</b>            | 12712               | 13185                | 11646              | 10777            |
| <i>L. japonicus</i>     | 48105               | 13471        | 13546        | 13434        | 13296        | 12712                   | <b>16268</b>        | 13719                | 11564              | 10932            |
| <i>M. truncatula</i>    | 57585               | 13333        | 13439        | 13360        | 13187        | 13185                   | 13719               | <b>15828</b>         | 11987              | 11229            |
| <i>A. thaliana</i>      | 35386               | 11429        | 11485        | 11489        | 11357        | 11646                   | 11564               | 11987                | <b>12665</b>       | 10685            |
| <i>O. sativa</i>        | 66338               | 10943        | 10992        | 10937        | 10873        | 10777                   | 10932               | 11229                | 10685              | <b>12526</b>     |
